# Supplementary material for: Interaction between IRF6 and TGFA Genes Contribute to the Risk of Nonsyndromic Cleft Lip/Palate
Source: PubMed Central journal article supplement (PMC3447924; doi:10.1371/journal.pone.0045441), 2012-09-20
Supplement: pone.0045441.s001.pdf [file pone.0045441.s001.pdf]

Table S1. Raw data used to generate attributable fraction results for ECLAMC population.

We used Haplotype Risk Calculations [37] using parental haplotypes not present in the affected child as control sample.

| Family ID | Ind ID | Founder 1 | Founder 2 | Gender | Affection | Cases     |           | Controls  |           |
|-----------|--------|-----------|-----------|--------|-----------|-----------|-----------|-----------|-----------|
|           |        |           |           |        |           | rs2235371 | rs1058213 | rs2235371 | rs1058213 |
| 1         | 1      | 2         | 3         | 2      | 2         | CC        | CC        | CT        | CC        |
| 1         | 2      | 0         | 0         | 2      | 1         | CT        | CC        |           |           |
| 1         | 3      | 0         | 0         | 1      | 1         | CC        | CC        |           |           |
| 2         | 1      | 2         | 3         | 2      | 2         | CC        | CC        | CT        | CC        |
| 2         | 2      | 0         | 0         | 2      | 1         | CT        | CC        |           |           |
| 2         | 3      | 0         | 0         | 1      | 1         | CC        | CC        |           |           |
| 3         | 1      | 2         | 3         | 1      | 2         | CC        | CC        | CT        | CC        |
| 3         | 2      | 0         | 0         | 2      | 1         | CC        | CC        |           |           |
| 3         | 3      | 0         | 0         | 1      | 1         | CT        | CC        |           |           |
| 6         | 1      | 2         | 3         | 1      | 2         | CC        | CC        | CC        | CC        |
| 6         | 2      | 0         | 0         | 1      | 1         | CC        | CC        |           |           |
| 6         | 3      | 0         | 0         | 2      | 1         | CC        | CC        |           |           |
| 12        | 1      | 2         | 3         | 1      | 2         | CT        | CC        | CT        | CC        |
| 12        | 2      | 0         | 0         | 1      | 1         | TT        | CC        |           |           |
| 12        | 3      | 0         | 0         | 2      | 1         | CC        | CC        |           |           |
| 13        | 1      | 2         | 3         | 1      | 2         | CC        | CC        | CC        | CT        |
| 13        | 2      | 0         | 0         | 1      | 1         | CC        | CT        |           |           |
| 13        | 3      | 0         | 0         | 2      | 1         | CC        | CC        |           |           |
| 15        | 1      | 2         | 3         | 1      | 2         | CC        | CC        | CC        | CC        |
| 15        | 2      | 0         | 0         | 1      | 1         | CC        | CC        |           |           |
| 15        | 3      | 0         | 0         | 2      | 1         | CC        | CC        |           |           |
| 17        | 1      | 2         | 3         | 2      | 2         | CC        | CC        | CC        | CC        |
| 17        | 2      | 0         | 0         | 1      | 1         | CC        | CC        |           |           |
| 17        | 3      | 0         | 0         | 2      | 1         | CC        | CC        |           |           |
| 18        | 1      | 2         | 3         | 2      | 2         | CC        | CC        | CT        | CT        |
| 18        | 2      | 0         | 0         | 1      | 1         | CT        | CC        |           |           |
| 18        | 3      | 0         | 0         | 2      | 1         | CC        | CT        |           |           |
| 20        | 1      | 2         | 3         | 2      | 2         | CC        | CC        | CC        | CC        |
| 20        | 2      | 0         | 0         | 2      | 1         | CC        | CC        |           |           |
| 20        | 3      | 0         | 0         | 1      | 1         | CC        | CC        |           |           |
| 21        | 1      | 2         | 3         | 1      | 2         | CC        | CC        | CC        | CC        |
| 21        | 2      | 0         | 0         | 2      | 1         | CC        | CC        |           |           |
| 21        | 3      | 0         | 0         | 1      | 1         | CC        | CC        |           |           |
| 23        | 1      | 2         | 3         | 1      | 2         | CC        | CC        | CC        | CT        |
| 23        | 2      | 0         | 0         | 2      | 1         | CC        | CC        |           |           |
| 23        | 3      | 0         | 0         | 1      | 1         | CC        | CT        |           |           |
| 25        | 1      | 2         | 3         | 2      | 2         | CC        | CT        | CC        | CT        |
| 25        | 2      | 0         | 0         | 2      | 1         | CC        | CC        |           |           |
| 25        | 3      | 0         | 0         | 1      | 1         | CC        | TT        |           |           |
| 26        | 1      | 2         | 3         | 2      | 2         | CT        | CC        | CC        | CC        |
| 26        | 2      | 0         | 0         | 2      | 1         | CT        | CC        |           |           |
| 26        | 3      | 0         | 0         | 1      | 1         | CC        | CC        |           |           |
| 30        | 1      | 2         | 3         | 1      | 2         | CT        | CC        | TT        | CC        |
| 30        | 2      | 0         | 0         | 2      | 1         | TT        | CC        |           |           |
| 30        | 3      | 0         | 0         | 1      | 1         | CT        | CC        |           |           |
| 31        | 1      | 2         | 3         | 1      | 2         | CC        | CC        | CC        | CC        |
| 31        | 2      | 0         | 0         | 2      | 1         | CC        | CC        |           |           |
| 31        | 3      | 0         | 0         | 1      | 1         | CC        | CC        |           |           |
| 32        | 1      | 2         | 3         | 2      | 2         | CT        | CT        | CT        | CC        |
| 32        | 2      | 0         | 0         | 2      | 1         | TT        | CC        |           |           |
| 32        | 3      | 0         | 0         | 1      | 1         | CC        | CT        |           |           |
| 34        | 1      | 2         | 3         | 1      | 2         | CC        | CC        | CC        | CT        |
| 34        | 2      | 0         | 0         | 2      | 1         | CC        | CT        |           |           |
| 34        | 3      | 0         | 0         | 1      | 1         | CC        | CC        |           |           |
| 35        | 1      | 2         | 3         | 1      | 2         | CC        | CT        | CT        | CC        |
| 35        | 2      | 0         | 0         | 2      | 1         | CT        | CC        |           |           |
| 35        | 3      | 0         | 0         | 1      | 1         | CC        | CT        |           |           |
| 36        | 1      | 2         | 3         | 2      | 2         | CT        | CC        | CT        | CT        |
| 36        | 2      | 0         | 0         | 2      | 1         | TT        | CC        |           |           |
| 36        | 3      | 0         | 0         | 1      | 1         | CC        | CT        |           |           |
| 38        | 1      | 2         | 3         | 2      | 2         | CC        | CC        | CC        | CC        |
| 38        | 2      | 0         | 0         | 2      | 1         | CC        | CC        |           |           |
| 38        | 3      | 0         | 0         | 1      | 1         | CC        | CC        |           |           |
| 40        | 1      | 2         | 3         | 2      | 2         | CC        | TT        | CC        | CC        |
| 40        | 2      | 0         | 0         | 2      | 1         | CC        | CT        |           |           |
| 40        | 3      | 0         | 0         | 1      | 1         | CC        | CT        |           |           |
| 41        | 1      | 2         | 3         | 1      | 2         | CC        | CC        | CC        | CC        |
| 41        | 2      | 0         | 0         | 2      | 1         | CC        | CC        |           |           |
| 41        | 3      | 0         | 0         | 1      | 1         | CC        | CC        |           |           |
| 45        | 1      | 2         | 3         | 1      | 2         | CT        | CC        | CT        | CC        |
| 45        | 2      | 0         | 0         | 2      | 1         | CT        | CC        |           |           |
| 45        | 3      | 0         | 0         | 1      | 1         | CT        | CC        |           |           |
| 46        | 1      | 2         | 3         | 2      | 2         | CC        | CC        | CC        | CT        |
| 46        | 2      | 0         | 0         | 2      | 1         | CC        | CC        |           |           |
| 46        | 3      | 0         | 0         | 1      | 1         | CC        | CT        |           |           |
| 48        | 1      | 2         | 3         | 2      | 2         | CT        | CC        | CC        | CC        |
| 48        | 2      | 0         | 0         | 2      | 1         | CC        | CC        |           |           |
| 48        | 3      | 0         | 0         | 1      | 1         | CT        | CC        |           |           |
| 49        | 1      | 2         | 3         | 2      | 2         | CC        | CT        | CT        | CC        |
| 49        | 2      | 0         | 0         | 2      | 1         | CC        | CT        |           |           |
| 49        | 3      | 0         | 0         | 1      | 1         | CT        | CC        |           |           |
| 50        | 1      | 2         | 3         | 2      | 2         | CC        | CC        | CC        | CT        |

|    |   |   |   |   |   |    |    |    |    |
|----|---|---|---|---|---|----|----|----|----|
| 50 | 2 | 0 | 0 | 2 | 1 | CC | CC |    |    |
| 50 | 3 | 0 | 0 | 1 | 1 | CC | CT |    |    |
| 51 | 1 | 2 | 3 | 1 | 2 | CT | CT | CT | CC |
| 51 | 2 | 0 | 0 | 2 | 1 | CT | CT |    |    |
| 51 | 3 | 0 | 0 | 1 | 1 | CT | CC |    |    |
| 52 | 1 | 2 | 3 | 2 | 2 | CC | CC | CT | CC |
| 52 | 2 | 0 | 0 | 2 | 1 | CT | CC |    |    |
| 52 | 3 | 0 | 0 | 1 | 1 | CC | CC |    |    |
| 53 | 1 | 2 | 3 | 1 | 2 | CC | CC | CC | CT |
| 53 | 2 | 0 | 0 | 2 | 1 | CC | CC |    |    |
| 53 | 3 | 0 | 0 | 1 | 1 | CC | CT |    |    |
| 55 | 1 | 2 | 3 | 1 | 2 | CC | CT | CC | CT |
| 55 | 2 | 0 | 0 | 2 | 1 | CC | CC |    |    |
| 55 | 3 | 0 | 0 | 1 | 1 | CC | TT |    |    |
| 56 | 1 | 2 | 3 | 1 | 2 | CC | CC | CT | CT |
| 56 | 2 | 0 | 0 | 2 | 1 | CT | CT |    |    |
| 56 | 3 | 0 | 0 | 1 | 1 | CC | CC |    |    |
| 57 | 1 | 2 | 3 | 1 | 2 | CT | CC | CT | CT |
| 57 | 2 | 0 | 0 | 2 | 1 | CC | CT |    |    |
| 57 | 3 | 0 | 0 | 1 | 1 | TT | CC |    |    |
| 59 | 1 | 2 | 3 | 1 | 2 | CT | CC | CC | CC |
| 59 | 2 | 0 | 0 | 2 | 1 | CC | CC |    |    |
| 59 | 3 | 0 | 0 | 1 | 1 | CT | CC |    |    |
| 60 | 1 | 2 | 3 | 1 | 2 | CC | CC | CT | CC |
| 60 | 2 | 0 | 0 | 2 | 1 | CT | CC |    |    |
| 60 | 3 | 0 | 0 | 1 | 1 | CC | CC |    |    |
| 61 | 1 | 2 | 3 | 1 | 2 | CC | CC | CT | CC |
| 61 | 2 | 0 | 0 | 2 | 1 | CT | CC |    |    |
| 61 | 3 | 0 | 0 | 1 | 1 | CC | CC |    |    |
| 62 | 1 | 2 | 3 | 1 | 2 | CC | TT | CT | CT |
| 62 | 2 | 0 | 0 | 2 | 1 | CC | CT |    |    |
| 62 | 3 | 0 | 0 | 1 | 1 | CT | TT |    |    |
| 63 | 1 | 2 | 3 | 1 | 2 | CC | CC | TT | CC |
| 63 | 2 | 0 | 0 | 2 | 1 | CT | CC |    |    |
| 63 | 3 | 0 | 0 | 1 | 1 | CT | CC |    |    |
| 64 | 1 | 2 | 3 | 1 | 2 | CC | CC | CC | CT |
| 64 | 2 | 0 | 0 | 2 | 1 | CC | CC |    |    |
| 64 | 3 | 0 | 0 | 1 | 1 | CC | CT |    |    |
| 66 | 1 | 2 | 3 | 2 | 2 | CC | CT | CT | CC |
| 66 | 2 | 0 | 0 | 2 | 1 | CT | CT |    |    |
| 66 | 3 | 0 | 0 | 1 | 1 | CC | CC |    |    |
| 73 | 1 | 2 | 3 | 1 | 2 | CC | CT | TT | CC |
| 73 | 2 | 0 | 0 | 2 | 1 | CT | CT |    |    |
| 73 | 3 | 0 | 0 | 1 | 1 | CT | CC |    |    |
| 76 | 1 | 2 | 3 | 1 | 2 | CC | CC | CC | CC |
| 76 | 2 | 0 | 0 | 2 | 1 | CC | CC |    |    |
| 76 | 3 | 0 | 0 | 1 | 1 | CC | CC |    |    |
| 77 | 1 | 2 | 3 | 1 | 2 | TT | CC | CT | CC |
| 77 | 2 | 0 | 0 | 2 | 1 | TT | CC |    |    |
| 77 | 3 | 0 | 0 | 1 | 1 | CT | CC |    |    |
| 78 | 1 | 2 | 3 | 1 | 2 | CC | CC | CC | CT |
| 78 | 2 | 0 | 0 | 2 | 1 | CC | CT |    |    |
| 78 | 3 | 0 | 0 | 1 | 1 | CC | CC |    |    |
| 79 | 1 | 2 | 3 | 1 | 2 | CC | CC | CC | CC |
| 79 | 2 | 0 | 0 | 2 | 1 | CC | CC |    |    |
| 79 | 3 | 0 | 0 | 1 | 1 | CC | CC |    |    |
| 81 | 1 | 2 | 3 | 1 | 2 | CC | CC | CC | CT |
| 81 | 2 | 0 | 0 | 2 | 1 | CC | CT |    |    |
| 81 | 3 | 0 | 0 | 1 | 1 | CC | CC |    |    |
| 82 | 1 | 2 | 3 | 1 | 2 | CC | CC | CT | CC |
| 82 | 2 | 0 | 0 | 2 | 1 | CC | CC |    |    |
| 82 | 3 | 0 | 0 | 1 | 1 | CT | CC |    |    |
| 83 | 1 | 2 | 3 | 1 | 2 | CT | CC | CT | TT |
| 83 | 2 | 0 | 0 | 2 | 1 | CT | CT |    |    |
| 83 | 3 | 0 | 0 | 1 | 1 | CT | CT |    |    |
| 85 | 1 | 2 | 3 | 2 | 2 | CC | CC | CT | CC |
| 85 | 2 | 0 | 0 | 2 | 1 | CC | CC |    |    |
| 85 | 3 | 0 | 0 | 1 | 1 | CT | CC |    |    |
| 87 | 1 | 2 | 3 | 1 | 2 | CC | CC | CC | CC |
| 87 | 2 | 0 | 0 | 2 | 1 | CC | CC |    |    |
| 87 | 3 | 0 | 0 | 1 | 1 | CC | CC |    |    |
| 88 | 1 | 2 | 3 | 1 | 2 | CC | CC | CC | CC |
| 88 | 2 | 0 | 0 | 2 | 1 | CC | CC |    |    |
| 88 | 3 | 0 | 0 | 1 | 1 | CC | CC |    |    |
| 89 | 1 | 2 | 3 | 1 | 2 | CC | CC | CC | CC |
| 89 | 2 | 0 | 0 | 2 | 1 | CC | CC |    |    |
| 89 | 3 | 0 | 0 | 1 | 1 | CC | CC |    |    |
| 90 | 1 | 2 | 3 | 1 | 2 | CC | CC | CT | CC |
| 90 | 2 | 0 | 0 | 2 | 1 | CT | CC |    |    |
| 90 | 3 | 0 | 0 | 1 | 1 | CC | CC |    |    |
| 93 | 1 | 2 | 3 | 1 | 2 | CC | CC | TT | CC |
| 93 | 2 | 0 | 0 | 2 | 1 | CT | CC |    |    |
| 93 | 3 | 0 | 0 | 1 | 1 | CT | CC |    |    |
| 94 | 1 | 2 | 3 | 1 | 2 | CT | CC | CT | CC |
| 94 | 2 | 0 | 0 | 2 | 1 | CT | CC |    |    |
| 94 | 3 | 0 | 0 | 1 | 1 | CT | CC |    |    |
| 95 | 1 | 2 | 3 | 1 | 2 | CC | CC | CC | CC |
| 95 | 2 | 0 | 0 | 2 | 1 | CC | CC |    |    |

|     |   |   |   |   |   |    |    |    |    |
|-----|---|---|---|---|---|----|----|----|----|
| 95  | 3 | 0 | 0 | 1 | 1 | CC | CC |    |    |
| 96  | 1 | 2 | 3 | 1 | 2 | CT | CC | CC | CC |
| 96  | 2 | 0 | 0 | 2 | 1 | CC | CC |    |    |
| 96  | 3 | 0 | 0 | 1 | 1 | CT | CC |    |    |
| 97  | 1 | 2 | 3 | 1 | 2 | CT | CT | CC | CT |
| 97  | 2 | 0 | 0 | 2 | 1 | CC | CT |    |    |
| 97  | 3 | 0 | 0 | 1 | 1 | CT | CT |    |    |
| 98  | 1 | 2 | 3 | 1 | 2 | CT | CC | CC | CC |
| 98  | 2 | 0 | 0 | 2 | 1 | CC | CC |    |    |
| 98  | 3 | 0 | 0 | 1 | 1 | CT | CC |    |    |
| 99  | 1 | 2 | 3 | 2 | 2 | CT | CC | CC | CC |
| 99  | 2 | 0 | 0 | 2 | 1 | CT | CC |    |    |
| 99  | 3 | 0 | 0 | 1 | 1 | CC | CC |    |    |
| 100 | 1 | 2 | 3 | 2 | 2 | CC | CC | CC | CC |
| 100 | 2 | 0 | 0 | 2 | 1 | CC | CC |    |    |
| 100 | 3 | 0 | 0 | 1 | 1 | CC | CC |    |    |
| 101 | 1 | 2 | 3 | 1 | 2 | CC | CC | CC | CC |
| 101 | 2 | 0 | 0 | 2 | 1 | CC | CC |    |    |
| 101 | 3 | 0 | 0 | 1 | 1 | CC | CC |    |    |
| 102 | 1 | 2 | 3 | 1 | 2 | CC | CC | CC | CC |
| 102 | 2 | 0 | 0 | 2 | 1 | CC | CC |    |    |
| 102 | 3 | 0 | 0 | 1 | 1 | CC | CC |    |    |
| 103 | 1 | 2 | 3 | 2 | 2 | CC | CC | CC | CC |
| 103 | 2 | 0 | 0 | 2 | 1 | CC | CC |    |    |
| 103 | 3 | 0 | 0 | 1 | 1 | CC | CC |    |    |
| 104 | 1 | 2 | 3 | 1 | 2 | CC | CC | CC | CT |
| 104 | 2 | 0 | 0 | 2 | 1 | CC | CT |    |    |
| 104 | 3 | 0 | 0 | 1 | 1 | CC | CC |    |    |
| 105 | 1 | 2 | 3 | 1 | 2 | CC | CC | CC | CT |
| 105 | 2 | 0 | 0 | 2 | 1 | CC | CC |    |    |
| 105 | 3 | 0 | 0 | 1 | 1 | CC | CT |    |    |
| 106 | 1 | 2 | 3 | 1 | 2 | CC | CC | CT | CC |
| 106 | 2 | 0 | 0 | 2 | 1 | CT | CC |    |    |
| 106 | 3 | 0 | 0 | 1 | 1 | CC | CC |    |    |
| 107 | 1 | 2 | 3 | 1 | 2 | CT | CC | CT | CT |
| 107 | 2 | 0 | 0 | 2 | 1 | CT | CC |    |    |
| 107 | 3 | 0 | 0 | 1 | 1 | CT | CT |    |    |
| 108 | 1 | 2 | 3 | 2 | 2 | CC | CC | CC | CC |
| 108 | 2 | 0 | 0 | 2 | 1 | CC | CC |    |    |
| 108 | 3 | 0 | 0 | 1 | 1 | CC | CC |    |    |
| 109 | 1 | 2 | 3 | 2 | 2 | CC | CT | CT | CC |
| 109 | 2 | 0 | 0 | 2 | 1 | CC | CC |    |    |
| 109 | 3 | 0 | 0 | 1 | 1 | CT | CT |    |    |
| 110 | 1 | 2 | 3 | 1 | 2 | CC | CC | TT | CC |
| 110 | 2 | 0 | 0 | 2 | 1 | CT | CC |    |    |
| 110 | 3 | 0 | 0 | 1 | 1 | CT | CC |    |    |
| 111 | 1 | 2 | 3 | 1 | 2 | CT | CT | CC | CC |
| 111 | 2 | 0 | 0 | 2 | 1 | CT | CT |    |    |
| 111 | 3 | 0 | 0 | 1 | 1 | CC | CC |    |    |
| 112 | 1 | 2 | 3 | 1 | 2 | CT | CC | CT | CC |
| 112 | 2 | 0 | 0 | 2 | 1 | CT | CC |    |    |
| 112 | 3 | 0 | 0 | 1 | 1 | CT | CC |    |    |
| 113 | 1 | 2 | 3 | 1 | 2 | CC | CT | CC | CT |
| 113 | 2 | 0 | 0 | 2 | 1 | CC | TT |    |    |
| 113 | 3 | 0 | 0 | 1 | 1 | CC | CC |    |    |
| 116 | 1 | 2 | 3 | 1 | 2 | CC | CT | CC | CC |
| 116 | 2 | 0 | 0 | 2 | 1 | CC | CT |    |    |
| 116 | 3 | 0 | 0 | 1 | 1 | CC | CC |    |    |
| 118 | 1 | 2 | 3 | 1 | 2 | CC | CC | TT | CC |
| 118 | 2 | 0 | 0 | 2 | 1 | CT | CC |    |    |
| 118 | 3 | 0 | 0 | 1 | 1 | CT | CC |    |    |
| 119 | 1 | 2 | 3 | 1 | 2 | CT | CC | CT | CC |
| 119 | 2 | 0 | 0 | 2 | 1 | CT | CC |    |    |
| 119 | 3 | 0 | 0 | 1 | 1 | CT | CC |    |    |
| 120 | 1 | 2 | 3 | 1 | 2 | CT | CC | CT | CC |
| 120 | 2 | 0 | 0 | 2 | 1 | CC | CC |    |    |
| 120 | 3 | 0 | 0 | 1 | 1 | TT | CC |    |    |
| 121 | 1 | 2 | 3 | 2 | 2 | CC | CC | CT | CT |
| 121 | 2 | 0 | 0 | 2 | 1 | CC | CC |    |    |
| 121 | 3 | 0 | 0 | 1 | 1 | CT | CT |    |    |
| 122 | 1 | 2 | 3 | 1 | 2 | CC | CC | CC | CC |
| 122 | 2 | 0 | 0 | 2 | 1 | CC | CC |    |    |
| 122 | 3 | 0 | 0 | 1 | 1 | CC | CC |    |    |
| 123 | 1 | 2 | 3 | 2 | 2 | CT | CC | TT | CC |
| 123 | 2 | 0 | 0 | 2 | 1 | CT | CC |    |    |
| 123 | 3 | 0 | 0 | 1 | 1 | TT | CC |    |    |
| 124 | 1 | 2 | 3 | 2 | 2 | CT | CC | CC | CC |
| 124 | 2 | 0 | 0 | 2 | 1 | CT | CC |    |    |
| 124 | 3 | 0 | 0 | 1 | 1 | CC | CC |    |    |
| 126 | 1 | 2 | 3 | 1 | 2 | CC | CC | TT | CT |
| 126 | 2 | 0 | 0 | 2 | 1 | CT | CC |    |    |
| 126 | 3 | 0 | 0 | 1 | 1 | CT | CT |    |    |
| 127 | 1 | 2 | 3 | 1 | 2 | CC | CC | CT | CT |
| 127 | 2 | 0 | 0 | 2 | 1 | CC | CT |    |    |
| 127 | 3 | 0 | 0 | 1 | 1 | CT | CC |    |    |
| 128 | 1 | 2 | 3 | 1 | 2 | CC | CC | CT | CC |
| 128 | 2 | 0 | 0 | 2 | 1 | CC | CC |    |    |
| 128 | 3 | 0 | 0 | 1 | 1 | CT | CC |    |    |

|     |   |   |   |   |   |    |    |    |    |
|-----|---|---|---|---|---|----|----|----|----|
| 129 | 1 | 2 | 3 | 1 | 2 | CT | CC | CT | CC |
| 129 | 2 | 0 | 0 | 2 | 1 | TT | CC |    |    |
| 129 | 3 | 0 | 0 | 1 | 1 | CC | CC |    |    |
| 130 | 1 | 2 | 3 | 2 | 2 | CC | CC | CC | CC |
| 130 | 2 | 0 | 0 | 2 | 1 | CC | CC |    |    |
| 130 | 3 | 0 | 0 | 1 | 1 | CC | CC |    |    |
| 131 | 1 | 2 | 3 |   | 2 | CC | CC | CC | CC |
| 131 | 2 | 0 | 0 | 2 | 1 | CC | CC |    |    |
| 131 | 3 | 0 | 0 | 1 | 1 | CC | CC |    |    |
| 134 | 1 | 2 | 3 |   | 2 | CC | CC | CC | CC |
| 134 | 2 | 0 | 0 | 2 | 1 | CC | CC |    |    |
| 134 | 3 | 0 | 0 | 1 | 1 | CC | CC |    |    |
| 137 | 1 | 2 | 3 |   | 2 | CT | CC | TT | CC |
| 137 | 2 | 0 | 0 | 2 | 1 | CT | CC |    |    |
| 137 | 3 | 0 | 0 | 1 | 1 | TT | CC |    |    |
| 143 | 1 | 2 | 3 | 2 | 2 | CT | CT | CT | CC |
| 143 | 2 | 0 | 0 | 2 | 1 | CT | CC |    |    |
| 143 | 3 | 0 | 0 | 1 | 1 | CT | CT |    |    |
| 144 | 1 | 2 | 3 | 2 | 2 | CC | CC | CC | CC |
| 144 | 2 | 0 | 0 | 2 | 1 | CC | CC |    |    |
| 144 | 3 | 0 | 0 | 1 | 1 | CC | CC |    |    |
| 145 | 1 | 2 | 3 | 1 | 2 | CC | CT | CT | CC |
| 145 | 2 | 0 | 0 | 2 | 1 | CT | CC |    |    |
| 145 | 3 | 0 | 0 | 1 | 1 | CC | CC |    |    |
| 146 | 1 | 2 | 3 | 1 | 2 | CT | CC | CT | CC |
| 146 | 2 | 0 | 0 | 2 | 1 | TT | CC |    |    |
| 146 | 3 | 0 | 0 | 1 | 1 | CC | CC |    |    |
| 157 | 1 | 2 | 3 | 1 | 2 | CC | CT | CT | CT |
| 157 | 2 | 0 | 0 | 2 | 1 | CT | CT |    |    |
| 157 | 3 | 0 | 0 | 1 | 1 | CC | CT |    |    |
| 158 | 1 | 2 | 3 | 1 | 2 | CT | CC | CT | CC |
| 158 | 2 | 0 | 0 | 2 | 1 | CT | CC |    |    |
| 158 | 3 | 0 | 0 | 1 | 1 | CT | CC |    |    |
| 163 | 1 | 2 | 3 | 1 | 2 | CC | CC | CT | TT |
| 163 | 2 | 0 | 0 | 2 | 1 | CC | CT |    |    |
| 163 | 3 | 0 | 0 | 1 | 1 | CT | CT |    |    |
| 164 | 1 | 2 | 3 | 1 | 2 | CC | CC | CC | CC |
| 164 | 2 | 0 | 0 | 2 | 1 | CC | CC |    |    |
| 164 | 3 | 0 | 0 | 1 | 1 | CC | CC |    |    |
| 167 | 1 | 2 | 3 |   | 2 | CC | CC | CC | CT |
| 167 | 2 | 0 | 0 | 2 | 1 | CC | CT |    |    |
| 167 | 3 | 0 | 0 | 1 | 1 | CC | CC |    |    |
| 170 | 1 | 2 | 3 |   | 2 | CC | CC | CC | CC |
| 170 | 2 | 0 | 0 | 2 | 1 | CC | CC |    |    |
| 170 | 3 | 0 | 0 | 1 | 1 | CC | CC |    |    |
| 172 | 1 | 2 | 3 |   | 2 | CT | CC | TT | CC |
| 172 | 2 | 0 | 0 | 2 | 1 | CT | CC |    |    |
| 172 | 3 | 0 | 0 | 1 | 1 | TT | CC |    |    |
| 173 | 1 | 2 | 3 |   | 2 | CC | CC | CC | CC |
| 173 | 2 | 0 | 0 | 2 | 1 | CC | CC |    |    |
| 173 | 3 | 0 | 0 | 1 | 1 | CC | CC |    |    |
| 174 | 1 | 2 | 3 |   | 2 | CC | CT | TT | CC |
| 174 | 2 | 0 | 0 | 2 | 1 | CT | CT |    |    |
| 174 | 3 | 0 | 0 | 1 | 1 | CT | CC |    |    |
| 175 | 1 | 2 | 3 |   | 2 | CC | CT | CC | CC |
| 175 | 2 | 0 | 0 | 2 | 1 | CC | CC |    |    |
| 175 | 3 | 0 | 0 | 1 | 1 | CC | CT |    |    |
| 176 | 1 | 2 | 3 |   | 2 | CC | CC | CT | CT |
| 176 | 2 | 0 | 0 | 2 | 1 | CC | CT |    |    |
| 176 | 3 | 0 | 0 | 1 | 1 | CT | CC |    |    |
| 177 | 1 | 2 | 3 | 1 | 2 | CT | CC | CC | CC |
| 177 | 2 | 0 | 0 | 2 | 1 | CT | CC |    |    |
| 177 | 3 | 0 | 0 | 1 | 1 | CC | CC |    |    |
| 178 | 1 | 2 | 3 | 2 | 2 | CC | CC | CT | CC |
| 178 | 2 | 0 | 0 | 2 | 1 | CT | CC |    |    |
| 178 | 3 | 0 | 0 | 1 | 1 | CC | CC |    |    |
| 179 | 1 | 2 | 3 | 2 | 2 | CC | CT | CC | CT |
| 179 | 2 | 0 | 0 | 2 | 1 | CC | CT |    |    |
| 179 | 3 | 0 | 0 | 1 | 1 | CC | CT |    |    |
| 180 | 1 | 2 | 3 | 2 | 2 | CT | CC | CC | CC |
| 180 | 2 | 0 | 0 | 2 | 1 | CC | CC |    |    |
| 180 | 3 | 0 | 0 | 1 | 1 | CT | CC |    |    |
| 181 | 1 | 2 | 3 | 1 | 2 | CC | CT | CT | CC |
| 181 | 2 | 0 | 0 | 2 | 1 | CC | CT |    |    |
| 181 | 3 | 0 | 0 | 1 | 1 | CT | CC |    |    |
| 182 | 1 | 2 | 3 | 1 | 2 | CT | CC | CC | CC |
| 182 | 2 | 0 | 0 | 2 | 1 | CT | CC |    |    |
| 182 | 3 | 0 | 0 | 1 | 1 | CC | CC |    |    |
| 183 | 1 | 2 | 3 | 1 | 2 | CT | CT | CT | CC |
| 183 | 2 | 0 | 0 | 2 | 1 | CT | CT |    |    |
| 183 | 3 | 0 | 0 | 1 | 1 | CT | CC |    |    |
| 185 | 1 | 2 | 3 | 2 | 2 | CC | CC | CC | CC |
| 185 | 2 | 0 | 0 | 2 | 1 | CC | CC |    |    |
| 185 | 3 | 0 | 0 | 1 | 1 | CC | CC |    |    |
| 186 | 1 | 2 | 3 | 1 | 2 | CT | CC | CC | CC |
| 186 | 2 | 0 | 0 | 2 | 1 | CC | CC |    |    |
| 186 | 3 | 0 | 0 | 1 | 1 | CT | CC |    |    |
| 188 | 1 | 2 | 3 | 2 | 2 | CT | CC | CC | CC |

|     |   |   |   |   |   |    |    |    |    |
|-----|---|---|---|---|---|----|----|----|----|
| 188 | 2 | 0 | 0 | 2 | 1 | CT | CC |    |    |
| 188 | 3 | 0 | 0 | 1 | 1 | CC | CC |    |    |
| 189 | 1 | 2 | 3 | 2 | 2 | CC | CC | CC | TT |
| 189 | 2 | 0 | 0 | 2 | 1 | CC | CT |    |    |
| 189 | 3 | 0 | 0 | 1 | 1 | CC | CT |    |    |
| 191 | 1 | 2 | 3 | 1 | 2 | CT | CC | CC | CT |
| 191 | 2 | 0 | 0 | 2 | 1 | CC | CC |    |    |
| 191 | 3 | 0 | 0 | 1 | 1 | CT | CT |    |    |
| 192 | 1 | 2 | 3 | 2 | 2 | CC | CC | CT | CC |
| 192 | 2 | 0 | 0 | 2 | 1 | CC | CC |    |    |
| 192 | 3 | 0 | 0 | 1 | 1 | CT | CC |    |    |
| 193 | 1 | 2 | 3 | 1 | 2 | CT | CC | CT | CC |
| 193 | 2 | 0 | 0 | 2 | 1 | TT | CC |    |    |
| 193 | 3 | 0 | 0 | 1 | 1 | CC | CC |    |    |
| 195 | 1 | 2 | 3 | 2 | 2 | CC | CC | CT | CC |
| 195 | 2 | 0 | 0 | 2 | 1 | CT | CC |    |    |
| 195 | 3 | 0 | 0 | 1 | 1 | CC | CC |    |    |
| 196 | 1 | 2 | 3 | 2 | 2 | CT | CC | CT | CC |
| 196 | 2 | 0 | 0 | 2 | 1 | CC | CC |    |    |
| 196 | 3 | 0 | 0 | 1 | 1 | TT | CC |    |    |
| 197 | 1 | 2 | 3 | 2 | 2 | CT | CC | CT | CC |
| 197 | 2 | 0 | 0 | 2 | 1 | CC | CC |    |    |
| 197 | 3 | 0 | 0 | 1 | 1 | TT | CC |    |    |
| 198 | 1 | 2 | 3 | 2 | 2 | CT | CC | CC | CC |
| 198 | 2 | 0 | 0 | 2 | 1 | CT | CC |    |    |
| 198 | 3 | 0 | 0 | 1 | 1 | CC | CC |    |    |
| 199 | 1 | 2 | 3 | 2 | 2 | CC | CC | CC | CC |
| 199 | 2 | 0 | 0 | 2 | 1 | CC | CC |    |    |
| 199 | 3 | 0 | 0 | 1 | 1 | CC | CC |    |    |
| 200 | 1 | 2 | 3 | 2 | 2 | CC | CC | TT | CC |
| 200 | 2 | 0 | 0 | 2 | 1 | CT | CC |    |    |
| 200 | 3 | 0 | 0 | 1 | 1 | CT | CC |    |    |
| 201 | 1 | 2 | 3 | 2 | 2 | CT | CC | CC | CC |
| 201 | 2 | 0 | 0 | 2 | 1 | CC | CC |    |    |
| 201 | 3 | 0 | 0 | 1 | 1 | CT | CC |    |    |
| 202 | 1 | 2 | 3 | 2 | 2 | CC | CC | TT | CC |
| 202 | 2 | 0 | 0 | 2 | 1 | CT | CC |    |    |
| 202 | 3 | 0 | 0 | 1 | 1 | CT | CC |    |    |
| 206 | 1 | 2 | 3 | 2 | 2 | CC | CC | CT | CT |
| 206 | 2 | 0 | 0 | 2 | 1 | CC | CT |    |    |
| 206 | 3 | 0 | 0 | 1 | 1 | CT | CC |    |    |
| 207 | 1 | 2 | 3 | 2 | 2 | CT | CC | CT | CC |
| 207 | 2 | 0 | 0 | 2 | 1 | CT | CC |    |    |
| 207 | 3 | 0 | 0 | 1 | 1 | CT | CC |    |    |
| 208 | 1 | 2 | 3 | 2 | 2 | CT | CT | CT | CC |
| 208 | 2 | 0 | 0 | 2 | 1 | CT | CC |    |    |
| 208 | 3 | 0 | 0 | 1 | 1 | CT | CT |    |    |
| 209 | 1 | 2 | 3 | 2 | 2 | CC | CC | CC | CC |
| 209 | 2 | 0 | 0 | 2 | 1 | CC | CC |    |    |
| 209 | 3 | 0 | 0 | 1 | 1 | CC | CC |    |    |
| 210 | 1 | 2 | 3 | 2 | 2 | CT | CC | CT | CC |
| 210 | 2 | 0 | 0 | 2 | 1 | CT | CC |    |    |
| 210 | 3 | 0 | 0 | 1 | 1 | CT | CC |    |    |
| 211 | 1 | 2 | 3 | 2 | 2 | CC | CC | TT | CT |
| 211 | 2 | 0 | 0 | 2 | 1 | CT | CT |    |    |
| 211 | 3 | 0 | 0 | 1 | 1 | CT | CC |    |    |
| 212 | 1 | 2 | 3 | 2 | 2 | CC | CC | TT | CC |
| 212 | 2 | 0 | 0 | 2 | 1 | CT | CC |    |    |
| 212 | 3 | 0 | 0 | 1 | 1 | CT | CC |    |    |
| 213 | 1 | 2 | 3 | 1 | 2 | CC | CT | CC | CC |
| 213 | 2 | 0 | 0 | 2 | 1 | CC | CT |    |    |
| 213 | 3 | 0 | 0 | 1 | 1 | CC | CC |    |    |
| 214 | 1 | 2 | 3 | 1 | 2 | CC | CC | CT | CC |
| 214 | 2 | 0 | 0 | 2 | 1 | CT | CC |    |    |
| 214 | 3 | 0 | 0 | 1 | 1 | CC | CC |    |    |
| 215 | 1 | 2 | 3 | 2 | 2 | CC | CC | CC | CC |
| 215 | 2 | 0 | 0 | 2 | 1 | CC | CC |    |    |
| 215 | 3 | 0 | 0 | 1 | 1 | CC | CC |    |    |
| 216 | 1 | 2 | 3 | 1 | 2 | CC | CC | CC | CT |
| 216 | 2 | 0 | 0 | 2 | 1 | CC | CC |    |    |
| 216 | 3 | 0 | 0 | 1 | 1 | CC | CT |    |    |
| 217 | 1 | 2 | 3 | 2 | 2 | CC | CC | CC | CC |
| 217 | 2 | 0 | 0 | 2 | 1 | CC | CC |    |    |
| 217 | 3 | 0 | 0 | 1 | 1 | CC | CC |    |    |
| 218 | 1 | 2 | 3 | 2 | 2 | CC | CT | CC | CT |
| 218 | 2 | 0 | 0 | 2 | 1 | CC | CT |    |    |
| 218 | 3 | 0 | 0 | 1 | 1 | CC | CT |    |    |
| 219 | 1 | 2 | 3 | 2 | 2 | CT | CC | CT | CC |
| 219 | 2 | 0 | 0 | 2 | 1 | CT | CC |    |    |
| 219 | 3 | 0 | 0 | 1 | 1 | CT | CC |    |    |
| 222 | 1 | 2 | 3 | 1 | 2 | CT | TT | CT | CT |
| 222 | 2 | 0 | 0 | 2 | 1 | CC | TT |    |    |
| 222 | 3 | 0 | 0 | 1 | 1 | TT | CT |    |    |
| 223 | 1 | 2 | 3 | 1 | 2 | CC | CC | CC | CT |
| 223 | 2 | 0 | 0 | 2 | 1 | CC | CC |    |    |
| 223 | 3 | 0 | 0 | 1 | 1 | CC | CT |    |    |
| 224 | 1 | 2 | 3 | 2 | 2 | CC | CC | CC | CT |
| 224 | 2 | 0 | 0 | 2 | 1 | CC | CT |    |    |

|     |   |   |   |   |   |    |    |    |    |
|-----|---|---|---|---|---|----|----|----|----|
| 224 | 3 | 0 | 0 | 1 | 1 | CC | CC |    |    |
| 225 | 1 | 2 | 3 | 2 | 2 | CC | CC | CC | CC |
| 225 | 2 | 0 | 0 | 2 | 1 | CC | CC |    |    |
| 225 | 3 | 0 | 0 | 1 | 1 | CC | CC |    |    |
| 226 | 1 | 2 | 3 |   | 2 | CT | CC | CT | CC |
| 226 | 2 | 0 | 0 | 2 | 1 | CT | CC |    |    |
| 226 | 3 | 0 | 0 | 1 | 1 | CT | CC |    |    |
| 228 | 1 | 2 | 3 | 2 | 2 | CC | CC | CT | TT |
| 228 | 2 | 0 | 0 | 2 | 1 | CC | CT |    |    |
| 228 | 3 | 0 | 0 | 1 | 1 | CT | CT |    |    |
| 230 | 1 | 2 | 3 | 1 | 2 | CT | CC | CC | CC |
| 230 | 2 | 0 | 0 | 2 | 1 | CT | CC |    |    |
| 230 | 3 | 0 | 0 | 1 | 1 | CC | CC |    |    |
| 235 | 1 | 2 | 3 |   | 2 | CC | CC | CT | CC |
| 235 | 2 | 0 | 0 | 2 | 1 | CT | CC |    |    |
| 235 | 3 | 0 | 0 | 1 | 1 | CC | CC |    |    |
| 236 | 1 | 2 | 3 |   | 2 | CC | CC | CC | CC |
| 236 | 2 | 0 | 0 | 2 | 1 | CC | CC |    |    |
| 236 | 3 | 0 | 0 | 1 | 1 | CC | CC |    |    |
| 237 | 1 | 2 | 3 |   | 2 | CC | CC | CC | CT |
| 237 | 2 | 0 | 0 | 2 | 1 | CC | CT |    |    |
| 237 | 3 | 0 | 0 | 1 | 1 | CC | CC |    |    |
| 238 | 1 | 2 | 3 |   | 2 | TT | CC | CT | CC |
| 238 | 2 | 0 | 0 | 2 | 1 | CT | CC |    |    |
| 238 | 3 | 0 | 0 | 1 | 1 | TT | CC |    |    |
| 239 | 1 | 2 | 3 |   | 2 | CC | CC | CC | CC |
| 239 | 2 | 0 | 0 | 2 | 1 | CC | CC |    |    |
| 239 | 3 | 0 | 0 | 1 | 1 | CC | CC |    |    |
| 241 | 1 | 2 | 3 | 2 | 2 | CC | CC | CC | CC |
| 241 | 2 | 0 | 0 | 2 | 1 | CC | CC |    |    |
| 241 | 3 | 0 | 0 | 1 | 1 | CC | CC |    |    |
| 242 | 1 | 2 | 3 | 2 | 2 | CC | CC | CT | CC |
| 242 | 2 | 0 | 0 | 2 | 1 | CT | CC |    |    |
| 242 | 3 | 0 | 0 | 1 | 1 | CC | CC |    |    |
| 244 | 1 | 2 | 3 | 2 | 2 | CC | CC | CC | CC |
| 244 | 2 | 0 | 0 | 2 | 1 | CC | CC |    |    |
| 244 | 3 | 0 | 0 | 1 | 1 | CC | CC |    |    |
| 245 | 1 | 2 | 3 | 2 | 2 | CC | CC | CC | CC |
| 245 | 2 | 0 | 0 | 2 | 1 | CC | CC |    |    |
| 245 | 3 | 0 | 0 | 1 | 1 | CC | CC |    |    |
| 246 | 1 | 2 | 3 | 1 | 2 | CC | CC | CC | CC |
| 246 | 2 | 0 | 0 | 2 | 1 | CC | CC |    |    |
| 246 | 3 | 0 | 0 | 1 | 1 | CC | CC |    |    |
| 248 | 1 | 2 | 3 | 2 | 2 | CC | CC | CC | CT |
| 248 | 2 | 0 | 0 | 2 | 1 | CC | CC |    |    |
| 248 | 3 | 0 | 0 | 1 | 1 | CC | CT |    |    |
| 252 | 1 | 2 | 3 | 2 | 2 | CC | CT | TT | CT |
| 252 | 2 | 0 | 0 | 2 | 1 | CT | TT |    |    |
| 252 | 3 | 0 | 0 | 1 | 1 | CT | CC |    |    |
| 257 | 1 | 2 | 3 | 1 | 2 | CT | CC | CT | CC |
| 257 | 2 | 0 | 0 | 2 | 1 | CT | CC |    |    |
| 257 | 3 | 0 | 0 | 1 | 1 | CT | CC |    |    |
| 258 | 1 | 2 | 3 | 2 | 2 | TT | CC | CT | CC |
| 258 | 2 | 0 | 0 | 2 | 1 | CT | CC |    |    |
| 258 | 3 | 0 | 0 | 1 | 1 | TT | CC |    |    |
| 259 | 1 | 2 | 3 | 2 | 2 | CC | TT | CC | CC |
| 259 | 2 | 0 | 0 | 2 | 1 | CC | CT |    |    |
| 259 | 3 | 0 | 0 | 1 | 1 | CC | CT |    |    |
| 262 | 1 | 2 | 3 |   | 2 | CC | CC | CC | CC |
| 262 | 2 | 0 | 0 | 2 | 1 | CC | CC |    |    |
| 262 | 3 | 0 | 0 | 1 | 1 | CC | CC |    |    |
| 263 | 1 | 2 | 3 |   | 2 | CC | CC | CC | CC |
| 263 | 2 | 0 | 0 | 2 | 1 | CC | CC |    |    |
| 263 | 3 | 0 | 0 | 1 | 1 | CC | CC |    |    |
| 266 | 1 | 2 | 3 |   | 2 | CT | CC | CT | CC |
| 266 | 2 | 0 | 0 | 2 | 1 | CC | CC |    |    |
| 266 | 3 | 0 | 0 | 1 | 1 | TT | CC |    |    |
| 267 | 1 | 2 | 3 |   | 2 | CC | CT | CT | CC |
| 267 | 2 | 0 | 0 | 2 | 1 | CT | CC |    |    |
| 267 | 3 | 0 | 0 | 1 | 1 | CC | CT |    |    |
| 269 | 1 | 2 | 3 |   | 2 | CT | CC | TT | CC |
| 269 | 2 | 0 | 0 | 2 | 1 | CT | CC |    |    |
| 269 | 3 | 0 | 0 | 1 | 1 | TT | CC |    |    |
| 271 | 1 | 2 | 3 |   | 2 | CT | CC | TT | CC |
| 271 | 2 | 0 | 0 | 2 | 1 | TT | CC |    |    |
| 271 | 3 | 0 | 0 | 1 | 1 | CT | CC |    |    |
| 272 | 1 | 2 | 3 |   | 2 | CT | CT | TT | CT |
| 272 | 2 | 0 | 0 | 2 | 1 | CT | CT |    |    |
| 272 | 3 | 0 | 0 | 1 | 1 | TT | CT |    |    |
| 273 | 1 | 2 | 3 |   | 2 | CT | CC | TT | CC |
| 273 | 2 | 0 | 0 | 2 | 1 | CT | CC |    |    |
| 273 | 3 | 0 | 0 | 1 | 1 | TT | CC |    |    |
| 274 | 1 | 2 | 3 |   | 2 | CC | CC | CC | CC |
| 274 | 2 | 0 | 0 | 2 | 1 | CC | CC |    |    |
| 274 | 3 | 0 | 0 | 1 | 1 | CC | CC |    |    |
| 276 | 1 | 2 | 3 |   | 2 | CC | CC | CT | CC |
| 276 | 2 | 0 | 0 | 2 | 1 | CT | CC |    |    |
| 276 | 3 | 0 | 0 | 1 | 1 | CC | CC |    |    |

|     |   |   |   |   |   |    |    |    |    |
|-----|---|---|---|---|---|----|----|----|----|
| 277 | 1 | 2 | 3 | 2 | 2 | CC | CT | CT | CT |
| 277 | 2 | 0 | 0 | 2 | 1 | CT | CT |    |    |
| 277 | 3 | 0 | 0 | 1 | 1 | CC | CT |    |    |
| 278 | 1 | 2 | 3 | 1 | 2 | CT | CC | CT | CC |
| 278 | 2 | 0 | 0 | 2 | 1 | TT | CC |    |    |
| 278 | 3 | 0 | 0 | 1 | 1 | CC | CC |    |    |
| 279 | 1 | 2 | 3 |   | 2 | CT | CT | CT | CC |
| 279 | 2 | 0 | 0 | 2 | 1 | CT | CC |    |    |
| 279 | 3 | 0 | 0 | 1 | 1 | CT | CT |    |    |
| 281 | 1 | 2 | 3 | 2 | 2 | CT | CC | CC | CC |
| 281 | 2 | 0 | 0 | 2 | 1 | CT | CC |    |    |
| 281 | 3 | 0 | 0 | 1 | 1 | CC | CC |    |    |
| 282 | 1 | 2 | 3 |   | 2 | CC | CC | CT | CC |
| 282 | 2 | 0 | 0 | 2 | 1 | CC | CC |    |    |
| 282 | 3 | 0 | 0 | 1 | 1 | CT | CC |    |    |
| 285 | 1 | 2 | 3 |   | 2 | CC | CT | CT | CC |
| 285 | 2 | 0 | 0 | 2 | 1 | CT | CT |    |    |
| 285 | 3 | 0 | 0 | 1 | 1 | CC | CC |    |    |
| 286 | 1 | 2 | 3 |   | 2 | CT | CC | CC | CC |
| 286 | 2 | 0 | 0 | 2 | 1 | CT | CC |    |    |
| 286 | 3 | 0 | 0 | 1 | 1 | CC | CC |    |    |
| 287 | 1 | 2 | 3 |   | 2 | CC | CC | CT | CC |
| 287 | 2 | 0 | 0 | 2 | 1 | CC | CC |    |    |
| 287 | 3 | 0 | 0 | 1 | 1 | CT | CC |    |    |
| 291 | 1 | 2 | 3 |   | 2 | CC | CC | CC | CC |
| 291 | 2 | 0 | 0 | 2 | 1 | CC | CC |    |    |
| 291 | 3 | 0 | 0 | 1 | 1 | CC | CC |    |    |
| 293 | 1 | 2 | 3 |   | 2 | CC | CC | TT | CC |
| 293 | 2 | 0 | 0 | 2 | 1 | CT | CC |    |    |
| 293 | 3 | 0 | 0 | 1 | 1 | CT | CC |    |    |
| 294 | 1 | 2 | 3 |   | 2 | CC | CC | CC | CT |
| 294 | 2 | 0 | 0 | 2 | 1 | CC | CT |    |    |
| 294 | 3 | 0 | 0 | 1 | 1 | CC | CC |    |    |
| 295 | 1 | 2 | 3 |   | 2 | CT | TT | CC | CT |
| 295 | 2 | 0 | 0 | 2 | 1 | CC | TT |    |    |
| 295 | 3 | 0 | 0 | 1 | 1 | CT | CT |    |    |
| 296 | 1 | 2 | 3 | 1 | 2 | CC | CT | CC | CC |
| 296 | 2 | 0 | 0 | 2 | 1 | CC | CT |    |    |
| 296 | 3 | 0 | 0 | 1 | 1 | CC | CC |    |    |
| 297 | 1 | 2 | 3 | 1 | 2 | CC | CC | CT | CC |
| 297 | 2 | 0 | 0 | 2 | 1 | CT | CC |    |    |
| 297 | 3 | 0 | 0 | 1 | 1 | CC | CC |    |    |
| 298 | 1 | 2 | 3 | 1 | 2 | CC | CC | CC | CT |
| 298 | 2 | 0 | 0 | 2 | 1 | CC | CT |    |    |
| 298 | 3 | 0 | 0 | 1 | 1 | CC | CC |    |    |
| 299 | 1 | 2 | 3 | 1 | 2 | CC | CC | CC | CT |
| 299 | 2 | 0 | 0 | 2 | 1 | CC | CC |    |    |
| 299 | 3 | 0 | 0 | 1 | 1 | CC | CT |    |    |
| 300 | 1 | 2 | 3 |   | 2 | CT | CC | CC | CT |
| 300 | 2 | 0 | 0 | 2 | 1 | CC | CC |    |    |
| 300 | 3 | 0 | 0 | 1 | 1 | CT | CT |    |    |
| 302 | 1 | 2 | 3 | 1 | 2 | CT | CC | CC | CC |
| 302 | 2 | 0 | 0 | 2 | 1 | CC | CC |    |    |
| 302 | 3 | 0 | 0 | 1 | 1 | CT | CC |    |    |
| 303 | 1 | 2 | 3 | 1 | 2 | CT | CC | CT | CC |
| 303 | 2 | 0 | 0 | 2 | 1 | CT | CC |    |    |
| 303 | 3 | 0 | 0 | 1 | 1 | CT | CC |    |    |
| 304 | 1 | 2 | 3 |   | 2 | CC | CC | CC | CC |
| 304 | 2 | 0 | 0 | 2 | 1 | CC | CC |    |    |
| 304 | 3 | 0 | 0 | 1 | 1 | CC | CC |    |    |
